# Supplementary material for: RETRACTED: Fatty Acids Dietary Supplements Exert Anti-Inflammatory Action and Limit Ganglion Cell Degeneration in the Retina of the EAE Mouse Model of Multiple Sclerosis
Source: MDPI journal article supplement (doi:10.3390/nu10030325), 2018-03-08
Supplement: s1 [file s1]

*Supplementary Materials*

Fatty Acids Dietary Supplements Exert Anti-Inflammatory Action and Limit Ganglion Cell Degeneration in the Retina of the EAE Mouse Model of Multiple Sclerosis

Massimo Dal Monte 1,2,*, Maurizio Cammalleri 1,2, Filippo Locri 1, Rosario Amato 1,
Stefania Marsili 1, Dario Rusciano 3 and Paola Bagnoli 1,*

1 Department of Biology, University of Pisa, via San Zeno 31, 56127 Pisa, Italy;
maurizio.cammalleri@unipi.it (M.C.); filippo.locri@student.unisi.it (F.L.);
rosario.amato@student.unisi.it (R.A.); marsili@temple.edu (S.M.)

2 Interdepartmental Research Center Nutrafood “Nutraceuticals and Food for Health”, University of Pisa,
via del Borghetto 80, 56124 Pisa, Italy

3 Sooft Italia SpA, Contrada Molino 17, 63833 Montegiorgio (FM), Italy; dario.rusciano@sooft.it

***** Correspondence: massimo.dalmonte@unipi.it (M.D.M.); paola.bagnoli@unipi.it (P.B.);
Tel.: +39-050-2211426 (M.D.M.)

Received: date; Accepted: date; Published: date

**Table S1.** Sequences of primer sets used for qPCR experiments.

| **Gene** | **Primer sequence (5’ –> 3’)** | |
| --- | --- | --- |
| **Forward Primer** | **Reverse Primer** |
| *TNF-α* | GCCTCTTCTCATTCCTGCTT | CTCCTCCACTTGGTGGTTTG |
| *IL-1β* | TCCTTGTGCAAGTGTCTGAAGC | ATGAGTGATACTGCCTGCCTGA |
| *IL-6* | TCTGCAAGAGACTTCCATCCAGT | TCTGCAACTGCATCATCGTTGT |
| *IL-8* | ACTTTCAGAGACAGCAGAGC | GTGGTCCACTCTCAATCACT |
| *ICAM-1* | CGCTGTGCTTTGAGAACTGTG | ATACACGGTGATGGTAGCGGA |
| *GFAP* | CGGAGACGCATCACCTCTG | AGGGAGTGGAGGAGTCATTCG |
| *iNOS* | GGCAAACCCAAGGTCTACGTT | TCGCTCAAGTTCAGCTTGGT |
| *CD68* | TGTCTGATCTTGCTAGGACCG | GAGAGTAACGGCCTTTTTGTGA |
| *F4/80* | TGACTCACCTTGTGGTCCTAA | CTTCCCAGAATCCAGTCTTTCC |
| *OCM* | AGCATCACGGACATTCTGAGC | TGGTCGTTGTCTATGAACTGGA |
| *Rpl13a* | CACTCTGGAGGAGAAACGGAAGG | GCAGGCATGAGGCAAACAGTC |
